# Supplementary material for: Long-read metagenomics of soil communities reveals phylum-specific secondary metabolite dynamics
Source: PubMed Central journal article supplement (PMC8602731; doi:10.1038/s42003-021-02809-4), 2021-11-18
Supplement: 42003_2021_2809_MOESM3_ESM.pdf [file 42003_2021_2809_MOESM3_ESM.pdf]

## Description of Additional Supplementary Files

**File name:** Supplementary Data 1

**Description:** Raw metagenome and metatranscriptome statistics.

**File name:** Supplementary Data 2

**Description:** Assembly statistics of short- and long-read metagenomes as well as metatranscriptomes.

**File name:** Supplementary Data 3

**Description:** Each biosynthetic gene cluster identified from the assembled metagenomes in this study.

**File name:** Supplementary Data 4

**Description:** Each biosynthetic gene cluster identified in the metatranscriptomic assemblies.

**File name:** Supplementary Data 5

**Description:** The genes used to calculate transcription of biosynthetic gene clusters and core bacterial genes.

**File name:** Supplementary Data 6

**Description:** DESeq2 analysis of significantly transcribed genes between day and night-time transcription.

**File name:** Supplementary Data 7

**Description:** Transcriptional scores for cation-related genes.

**File name:** Supplementary Data 8

**Description:** Average abundance pattern for each phylum through time.

**File name:** Supplementary Data 9

**Description:** Taxonomic composition of metagenomes and metatranscriptomes using full-length 16S rRNA.

**File name:** Supplementary Data 10

**Description:** Normalized sequence data showing scores of transcription at each time point with BGC type and Phylum shown
